# Supplementary material for: Trend of telomerase activity change during human iPSC self-renewal and differentiation revealed by a quartz crystal microbalance based assay
Source: PubMed Central journal article supplement — Sci Rep. 2014 Nov 10;4:6978. doi: 10.1038/srep06978 (PMC4225532; doi:10.1038/srep06978), 2014-11-10
Supplement: srep06978-s1.pdf [file srep06978-s1.pdf]

# Supplementary Information

## Trend of telomerase activity change during human iPSC self-renewal and differentiation revealed by a quartz crystal microbalance based assay

Yitian Zhou<sup>1</sup>, Ping Zhou<sup>2, 3</sup>, Yinqiang Xin<sup>1</sup>, Jie Wang<sup>1</sup>, Zhiqiang Zhu<sup>1</sup>, Ji Hu<sup>4</sup>,  
Shicheng Wei<sup>2, 3</sup> & Hongwei Ma<sup>1</sup>

<sup>1</sup>Division of Nanobiomedicine, Suzhou Institute of Nano-Tech and Nano-Bionics, Chinese Academy of Sciences, Suzhou 215123, P. R. China, <sup>2</sup>Department of Oral and Maxillofacial Surgery, Laboratory of Interdisciplinary Studies, Peking University School of Stomatology, Beijing 100081, China, <sup>3</sup>Center for Biomedical Materials and Tissue Engineering, Academy for Advanced Interdisciplinary Studies, Peking University, 100871, Beijing, P.R. China, <sup>4</sup>Division of Endocrinology, the Second Affiliated Hospital, Soochow University, Suzhou 215000, P. R. China.

**E-mail:**

[hwma2008@sinano.ac.cn](mailto:hwma2008@sinano.ac.cn)

[sc-wei@pku.edu.cn](mailto:sc-wei@pku.edu.cn)

**Table S1. Methods for the detection of telomerase activity**

| Method                       | PCR-depended | Advantages (compared to Conventional TRAP)                                               | Disadvantages (compared to Conventional TRAP)                                     | Ref.  |
|------------------------------|--------------|------------------------------------------------------------------------------------------|-----------------------------------------------------------------------------------|-------|
| TRAP                         | +            | /                                                                                        | /                                                                                 | 1     |
| TRAP-[ <sup>32</sup> P]      | +            | Avoid false negative results                                                             | Radiological hazard                                                               | 2     |
| F-TRAP                       | +            | Nonisotopic                                                                              | /                                                                                 | 3     |
| TRAP-SPA                     | +            | PAGE-free, high-throughput, high signal/noise ratio                                      | [ <sup>3</sup> H]-TTP and biotinylated primer required                            | 4     |
| TRAP/HPA                     | +            | PAGE-free, Nonisotopic                                                                   | AE-labeled probe required                                                         | 5     |
| TP-TRAP                      | +            | High sensitive and linear result, PAGE-free                                              | [ <sup>3</sup> H]-TTP and two reverse Primers required                            | 6     |
| TRAP-ELISA                   | +            | High sensitive, PAGE-free and commercially available                                     | expensive                                                                         | 7     |
| TRAP with Amplifluor primers | +            | PAGE-free, commercially available                                                        | expensive                                                                         | 8     |
| RT-TRAP                      | +            | Exact quantitation, real-time, PAGE-free                                                 | Real-time PCR instrument required, High-priced                                    | 9     |
| In situ TRAP                 | +            | Microscopic identification of individual cells expressing telomerase activity, PAGE-free | Fluorescein isothiocyanate -labeled telomerase primer required and low-throughput | 10    |
| TMA/HPA                      | -            | Isothermic amplification, PAGE-free                                                      | AE-labeled probe required, false negative results                                 | 11    |
| Optical/color detection      | -            | Macroscopic, fast                                                                        | Low sensitive, modified primer/ AuNPs required                                    | 12,13 |
| TRE                          | -            | Real-time, label-free, information on reaction kinetics                                  | BIACORE apparatus and biotinylated substrate primer required                      | 14    |

Samples of undifferentiated hiPSCs, differentiated hiPSCs (for 1 day, 3 days and 5 days) and HeLa cells are measured with a standard TRAP assay for verification (Fig. S1). The result is consistent with figure 3 in the main text.

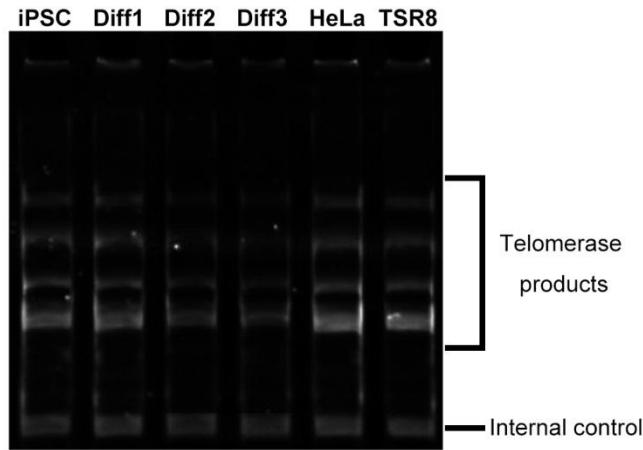

**Figure S1.** TRAP assay result (hiPSCs, differentiation of hiPSCs for 1 day, differentiation of hiPSCs for 3 days, differentiation of hiPSCs for 5 days, HeLa cells and positive control, from left to right) for the verification of QCM.

In order to ensure the reliability of TREAQ, we investigated the relationship between different cell lysate concentrations and Total Product Generated (TPG) according to the TRAP (Fig. S2).

(1). Measure the signal of the region of the gel lane corresponding to the TRAP product ladder bands from all samples including non-heat-treated ( $x$ ) and heat-treated sample extracts ( $x_0$ ),  $1 \times$  CHAPS Lysis Buffer only control ( $r_0$ ), and TSR8 quantitation control ( $r$ ).

(2). Measure the signal from the internal standard in non-heat-treated samples ( $c$ ) and TSR8 quantitation control ( $c_R$ ).

(3). Quantitate the amount of telomerase product using the following formula:

$$\text{TPG} = \frac{(x-x_0)/c}{(r-r_0)/c_R} \times 100 \text{ (if 0.1 amole of TSR8 is used)}$$

Each unit of TPG corresponds to the number of TS primers extended with at least 4 telomeric repeats by telomerase in the extract in a 30 minute incubation at 30 °C

(one of the steps of PCR in TRAP).

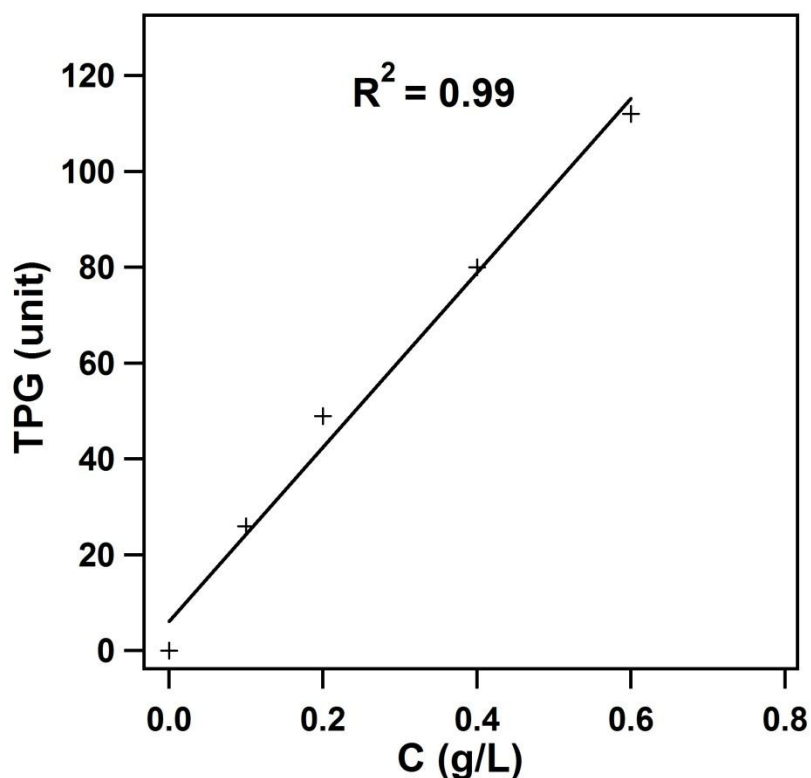

**Figure S2.** A linear relationship ( $y = 181.81x + 6.13$ ) between TPG and the cell lysate concentration, which indicated the favorable specificity compared with traditional methods.

In order to prove the binding of telomerase, three experiments were conducted as the following table.

**Table S2. Control experiments on gold chips**

| Primers | EG <sub>3</sub> | Cell lysate + dNTP | F <sub>T</sub> |
|---------|-----------------|--------------------|----------------|
| -       | -               | +                  | 150 Hz         |
| +       | -               | +                  | 105 Hz         |
| -       | +               | +                  | 30 Hz          |
| +       | +               | +                  | 78 Hz          |

For the experiment without primers and EG<sub>3</sub> on gold chips, the nonspecific

protein adsorption on whole area triggered 150 Hz frequency shift. But with primers on gold chips, only the remaining sites were available for the nonspecific protein, which triggered 105 Hz frequency shift. When only EG<sub>3</sub> exists, 30 Hz frequency shift was triggered as the whole chips were blocked by EG<sub>3</sub>.

As two substrates (gold and polymer) could be applied to TREAQ, we used HeLa cells to choose a better substrate for TREAQ. Firstly,  $F_T$  for HeLa cells on gold surface was less than  $F_T$  for HeLa cells on polymer surface ( $\Delta F_T = 27$  Hz), which meant the frequency signal had been amplified on polymer surface compared with gold surface. We deduced that this amplification could be attributed to the better immobilization of DNA primers. Secondly, nonspecific protein adsorption, an important phenomenon at the interface of biosensor, could be avoided on polymer surface. In this case, leaving out the EG<sub>3</sub> blocking step could save time and also improved the immobilization of DNA primers. For the two reasons above, we supposed that TREAQ based on polymer-coated chips was superior to that on gold chips (Fig. S3).

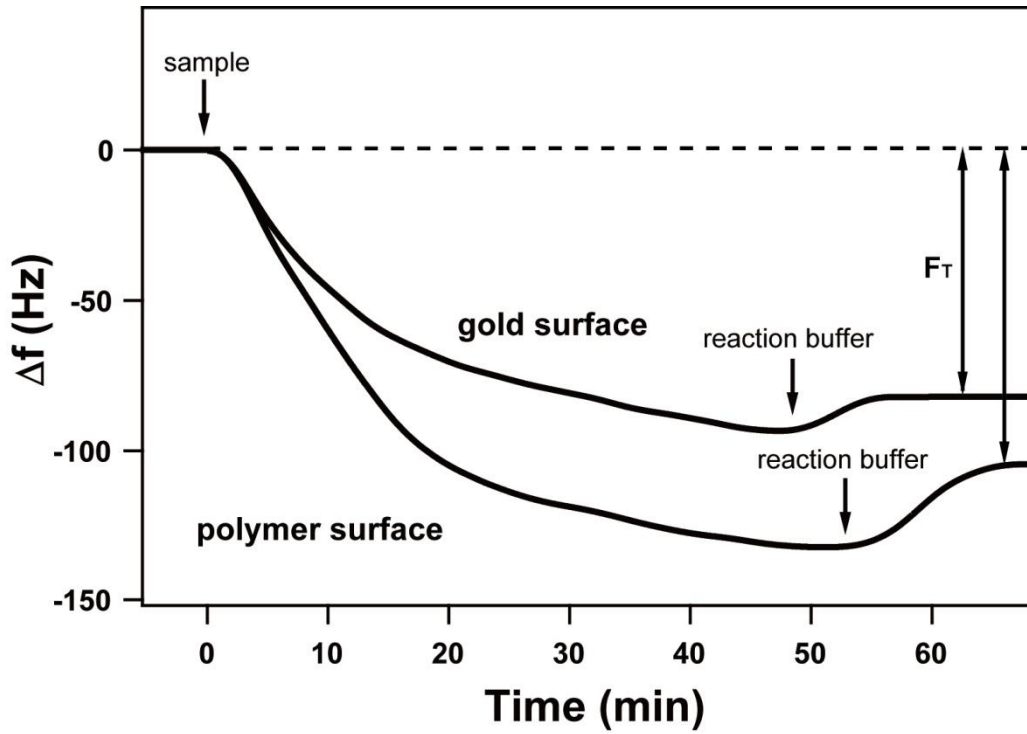

**Figure S3.** Real time QCM curves for HeLa cells on different substrates.

**Detailed calculation process by “solidified liquid layer” (SLL) model.**

1. The calculation of the film on the chip in the dry state.

According to Sauerbrey equation:

$$\Delta f = \frac{-2f_0^2 \Delta m}{A \sqrt{\mu_q \rho_q}} \quad (1)$$

$\rho_q$  -- density of quartz ( $\rho_q = 2.648 \text{ g/cm}^3$ )

$\mu_q$  -- Shear modulus of quartz for AT-cut crystal ( $\mu_q = 2.947 \times 10^{11} \text{ g/cm} \times \text{s}^2$ )

$f_0$  -- Resonant frequency (Hz)

$\Delta f$  -- Frequency change (Hz)

$\Delta m$  -- Mass change (g)

$A$  -- Piezoelectrically active crystal area (Area between electrodes,  $\text{cm}^2$ )

Equation (1) could be deduced next into equation (2)

$$\Delta m = C \frac{-\Delta f_n}{n} \quad (2)$$

$f_n = nf_0$ ,  $n = 1, 3, 5, 7, 9, 11, 13$ ;

Constant  $C$  is  $17.7 \text{ ng cm}^{-2} \text{ Hz}^{-1}$  for an AT-cut, 5 MHz quartz.

The mass increase in the air is calculated by equation (2).

$$-\Delta f_n = An + Bn^2 \quad (3)$$

Density  $\rho$  value in the air is 1.3, in the liquid is 1.1.

The thickness increase in the air is calculated by equation (3).

2. The calculation in the liquid by “solidified liquid layer” model.

$$-\Delta f_n = An + Bn^2 \quad (4)$$

$$A = 2f_0^2 \rho_f T_f / Z_q \quad (5)$$

$$B = -4\pi f_0^2 \rho_L T_L J_f / Z_q \quad (6)$$

We plug in the experiment result  $\Delta f_3$ ,  $\Delta f_5$ ,  $\Delta f_7$  into equation (4) and calculate the  $A$  value by fitting. The thickness of film in the liquid could be calculated by equation (5).

## References

1. Kim, N. W. *et al.* Specific association of human telomerase activity with immortal cells and cancer. *Science* **266**, 2011-2015 (1994).
2. Wright, W. E., Shay, J. W. & Piatyszek, M. A. Modifications of a telomeric repeat amplification protocol (TRAP) result in increased reliability, linearity and sensitivity. *Nucleic Acids Res.* **23**, 3794-3795 (1995).
3. Aldous, W. K. & Grabill, N. R. A fluorescent method for detection of telomerase activity.

*Diagn. Mol. Pathol.* **6**, 102-110 (1997).

4. Savovsky, E., Akamatsu, K., Tsuchiya, M. & Yamazaki, T. Detection of telomerase activity by combination of TRAP method and scintillation proximity assay (SPA). *Nucleic Acids Res.* **24**, 1175-1176 (1996).
5. Hirose, M. *et al.* A rapid, useful and quantitative method to measure telomerase activity by hybridization protection assay connected with a telomeric repeat amplification protocol. *J. Cancer Res. Clin.* **123**, 337-344 (1997).
6. Szatmari, I., Tokes, S., Dunn, C. B., Bardos, T. J. & Aradi, J. Modified telomeric repeat amplification protocol: A quantitative radioactive assay for telomerase without using electrophoresis. *Anal. Biochem.* **282**, 80-88 (2000).
7. Wei, L., Guo, Y. & Yan, Z. Detection of human telomerase activity by telomerase TRAP-ELISA assay. *Zhonghua Zhongliu Zazhi* **20**, 264-266 (1998).
8. Holt, S. E., Norton, J. C., Wright, W. E. & Shay, J. W. Comparison of the telomeric repeat amplification protocol (TRAP) to the new TRAP-eze telomerase detection kit. *Methods in Cell Science* **18**, 237-248 (1996).
9. Wege, H., Chui, M. S., Le, H. T., Tran, J. M. & Zern, M. A. SYBR Green real-time telomeric repeat amplification protocol for the rapid quantification of telomerase activity. *Nucleic Acids Res.* **31** (2003).
10. Ohyashiki, K. *et al.* Cytological detection of telomerase activity using an in situ telomeric repeat amplification protocol assay. *Cancer Res.* **57**, 2100-2103 (1997).
11. Hirose, M., Abe-Hashimoto, J., Tahara, H., Ide, T. & Yoshimura, T. New method to measure telomerase activity by transcription-mediated amplification and hybridization protection assay.



*Clin. Chem.* **44**, 2446-2452 (1998).

12. Schmidt, P. M., Lehmann, C., Matthes, E. & Bier, F. F. Detection of activity of telomerase in tumor cells using fiber optical biosensors. *Biosens. Bioelectron.* **17**, 1081-1087 (2002).

13. Wang, J., Wu, L., Ren, J. & Qu, X. Visualizing human telomerase activity with primer-modified Au nanoparticles. *Small* **8**, 259-264 (2012).

14. Maesawa, C. *et al.* A rapid biosensor chip assay for measuring of telomerase activity using surface plasmon resonance. *Nucleic Acids Res.* **31** (2003).
